# Supplementary material
Source: MDPI journal article supplement (https://www.mdpi.com/2673-8023/3/3/49)

## Electronic Supplementary Material

### **Matriz effect of properties of Au, ZnO and Eu<sub>2</sub>O<sub>3</sub>: Silica, titania and alumina matrices.**

C. Díaz<sup>a</sup>, and O. Cifuentes-Vaca<sup>b</sup> M. L. Valenzuela<sup>\*c</sup>

<sup>a</sup>*Departamento de Química, Facultad de Química, Universidad de Chile. La Palmeras 3425, Nuñoa, casilla 653, Santiago de Chile, Chile*

<sup>b</sup>*Facultad de Ciencias Exactas, Universidad Andrés Bello, Sede Concepción, Autopista Concepción-Talcahuano 7100, Talcahuano, Chile.*

<sup>c</sup>*Facultad de Ingeniería, Grupo de Investigación en Energía y Procesos Sustentables, Instituto de Ciencias Aplicadas, Universidad Autónoma de Chile. Av. El Llano Subercaseaux 2801. San Miguel. Santiago de Chile.*

S1 Table 1 Experimental Details of the synthesis of the precursors 1-18

| Precursor | Precursor Formula                                             | Matrix                             | metallic salt (g) | Polymer (g) | SiO <sub>2</sub> , TiO <sub>2</sub> or Al <sub>2</sub> O <sub>3</sub> | Acetic acid (mL) | H <sub>2</sub> O (mL) | Composite                                                       | Composite number |
|-----------|---------------------------------------------------------------|------------------------------------|-------------------|-------------|-----------------------------------------------------------------------|------------------|-----------------------|-----------------------------------------------------------------|------------------|
| (1)       | Chitosan·AuCl <sub>3</sub> /SiO <sub>2</sub>                  | <b>SiO<sub>2</sub></b>             | 0.4               | 0.51        | 28 mL                                                                 | 9.0              | 29                    | Au//SiO <sub>2</sub>                                            | C <sub>1</sub>   |
| (2)       | PS-co-4-PVP·AuCl <sub>3</sub> /SiO <sub>2</sub>               | <b>SiO<sub>2</sub></b>             | 0.4               | 0.76        | 28 mL                                                                 | 9.0              | 29                    | Au//SiO <sub>2</sub>                                            |                  |
| (3)       | Chitosan·AuCl <sub>3</sub> /TiO <sub>2</sub>                  | <b>TiO<sub>2</sub></b>             | 0.4               | 0.51        | 5 mL                                                                  | 0.48             | 0.43                  | Au//TiO <sub>2</sub>                                            | C <sub>2</sub>   |
| (4)       | PS-co-4-PVP·AuCl <sub>3</sub> /TiO <sub>2</sub>               | <b>TiO<sub>2</sub></b>             | 0.4               | 0.76        | 5 mL                                                                  | 0.48             | 0.43                  | Au//TiO <sub>2</sub>                                            |                  |
| (5)       | Chitosan·AuCl <sub>3</sub> /Al <sub>2</sub> O <sub>3</sub>    | <b>Al<sub>2</sub>O<sub>3</sub></b> | 0.4               | 0.51        | 5 mL                                                                  | 0.30             | 5                     | Au//Al <sub>2</sub> O <sub>3</sub>                              | C <sub>3</sub>   |
| (6)       | PS-co-4-PVP·AuCl <sub>3</sub> /Al <sub>2</sub> O <sub>3</sub> | <b>Al<sub>2</sub>O<sub>3</sub></b> | 0.4               | 0.76        | 5 mL                                                                  | 0.30             | 5                     | Au//Al <sub>2</sub> O <sub>3</sub>                              |                  |
| (7)       | Chitosan·ZnCl <sub>2</sub>                                    | <b>SiO<sub>2</sub></b>             | 0.4               | 0.51        | 28 mL                                                                 | 9.0              | 29                    | ZnO/SiO <sub>2</sub>                                            | C <sub>4</sub>   |
| (8)       | PS-co-4-PVP·ZnCl <sub>2</sub>                                 | <b>SiO<sub>2</sub></b>             | 0.4               | 0.76        | 28 mL                                                                 | 9.0              | 29                    | ZnO/SiO <sub>2</sub>                                            |                  |
| (9)       | Chitosan ZnCl <sub>2</sub>                                    | <b>TiO<sub>2</sub></b>             | 0.4               | 0.51        | 5 mL                                                                  | 0.48             | 0.43                  | ZnO/TiO <sub>2</sub>                                            | C <sub>5</sub>   |
| (10)      | PS-co-4-PVP·ZnCl <sub>2</sub>                                 | <b>TiO<sub>2</sub></b>             | 0.4               | 0.76        | 5 mL                                                                  | 0.48             | 0.43                  | ZnO/TiO <sub>2</sub>                                            |                  |
| (11)      | Chitosan·ZnCl <sub>2</sub>                                    | <b>Al<sub>2</sub>O<sub>3</sub></b> | 0.4               | 0.51        | 5 mL                                                                  | 0.30             | 5                     | ZnO/Al <sub>2</sub> O <sub>3</sub>                              | C <sub>6</sub>   |
| (12)      | ·PS-co-4-PVP·ZnCl <sub>2</sub>                                | <b>Al<sub>2</sub>O<sub>3</sub></b> | 0.4               | 0.76        | 5 mL                                                                  | 0.30             | 5                     | ZnO/Al <sub>2</sub> O <sub>3</sub>                              |                  |
| (13)      | Chitosan·Eu(NO <sub>3</sub> ) <sub>3</sub>                    | <b>SiO<sub>2</sub></b>             | 0.4               | 0.51        | 28 mL                                                                 | 9.0              | 29                    | Eu <sub>2</sub> O <sub>3</sub> / SiO <sub>2</sub>               | C <sub>7</sub>   |
| (14)      | PS-co-4-PVP·Eu(NO <sub>3</sub> ) <sub>3</sub>                 | <b>SiO<sub>2</sub></b>             | 0.4               | 0.76        | 28 mL                                                                 | 9.0              | 29                    | Eu <sub>2</sub> O <sub>3</sub> / SiO <sub>2</sub>               |                  |
| (15)      | Chitosan·Eu(NO <sub>3</sub> ) <sub>3</sub>                    | <b>TiO<sub>2</sub></b>             | 0.4               | 0.51        | 5 mL                                                                  | 0.48             | 0.43                  | Eu <sub>2</sub> O <sub>3</sub> / TiO <sub>2</sub>               | C <sub>8</sub>   |
| (16)      | PS-co-4-PVP·Eu(NO <sub>3</sub> ) <sub>3</sub>                 | <b>TiO<sub>2</sub></b>             | 0.4               | 0.76        | 5 mL                                                                  | 0.48             | 0.43                  | Eu <sub>2</sub> O <sub>3</sub> / TiO <sub>2</sub>               | C <sub>10</sub>  |
| (17)      | Chitosan·Eu(NO <sub>3</sub> ) <sub>3</sub>                    | <b>Al<sub>2</sub>O<sub>3</sub></b> | 0.4               | 0.51        | 5 mL                                                                  | 0.30             | 5                     | Eu <sub>2</sub> O <sub>3</sub> / Al <sub>2</sub> O <sub>3</sub> | C <sub>11</sub>  |
| (18)      | PS-co-4-PVP·Eu(NO <sub>3</sub> ) <sub>3</sub>                 | <b>Al<sub>2</sub>O<sub>3</sub></b> | 0.4               | 0.76        | 5 mL                                                                  | 0.30             | 5                     | Eu <sub>2</sub> O <sub>3</sub> / Al <sub>2</sub> O <sub>3</sub> | C <sub>12</sub>  |

S2 XRD pattern for the composites, Au/TiO<sub>2</sub>, Au/Al<sub>2</sub>O<sub>3</sub>, ZnO/TiO<sub>2</sub>, ZnO/Al<sub>2</sub>O<sub>3</sub> and Eu<sub>2</sub>O<sub>3</sub>/SiO<sub>2</sub>, Eu<sub>2</sub>O<sub>3</sub>/TiO<sub>2</sub> and Eu<sub>2</sub>O<sub>3</sub>/Al<sub>2</sub>O<sub>3</sub>

Au/TiO<sub>2</sub> from Chitosan precursor

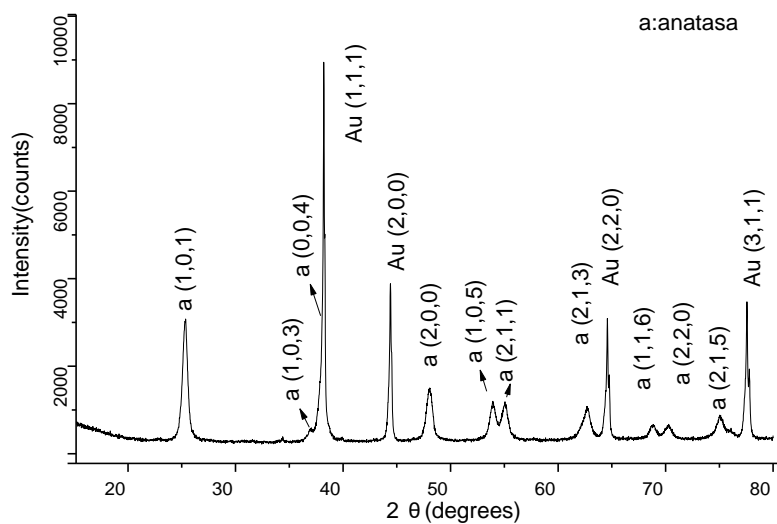

Au/TiO<sub>2</sub> from PS-co-4-PVP precursor

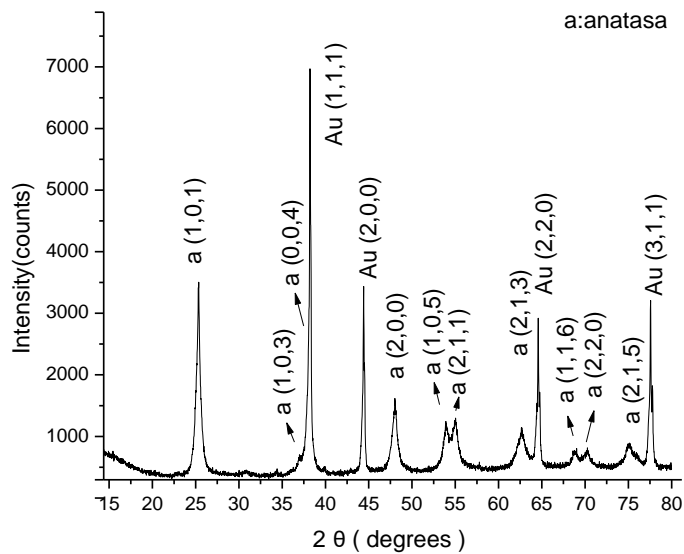

# Au/Al<sub>2</sub>O<sub>3</sub> from Chitosan precursors

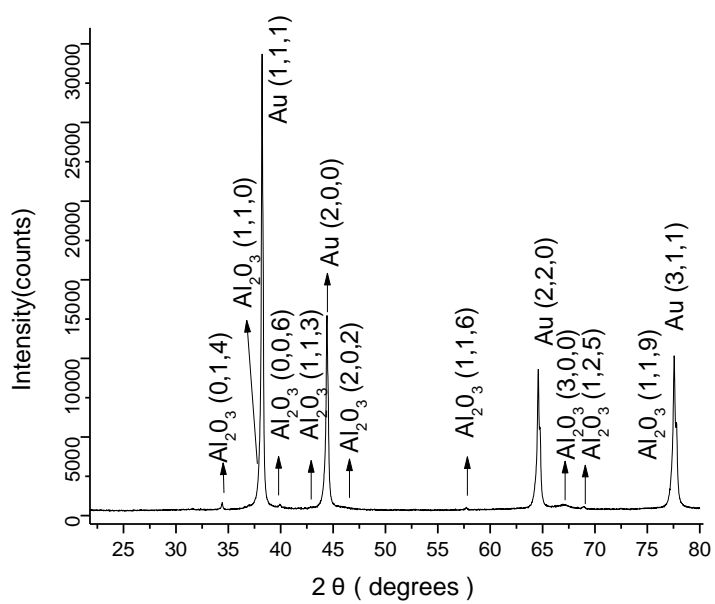

# Au/Al<sub>2</sub>O<sub>3</sub> from PS-co-4-PVP precursors

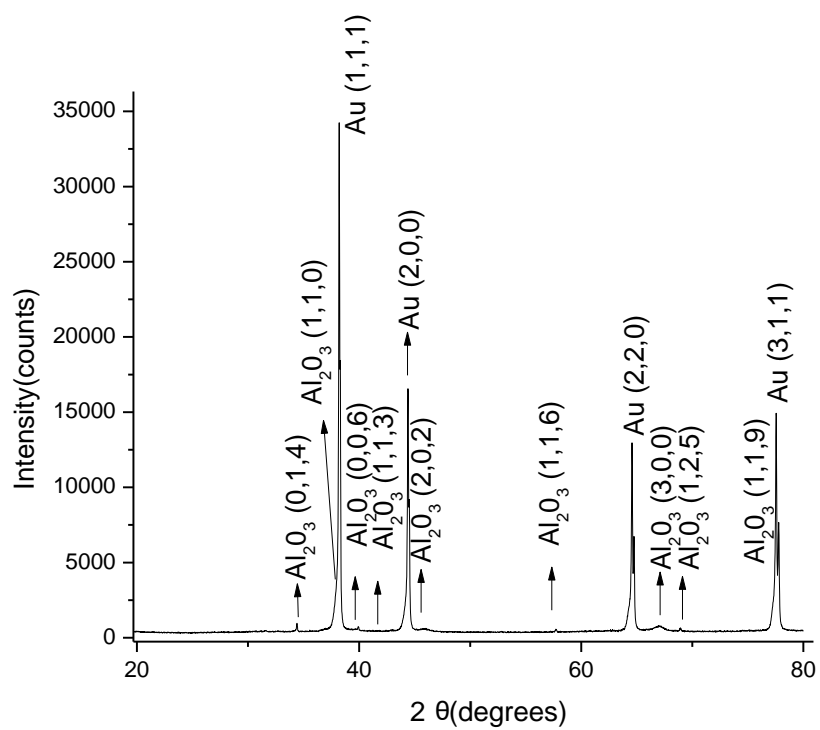

# ZnO/TiO<sub>2</sub> from Chitosan precursors

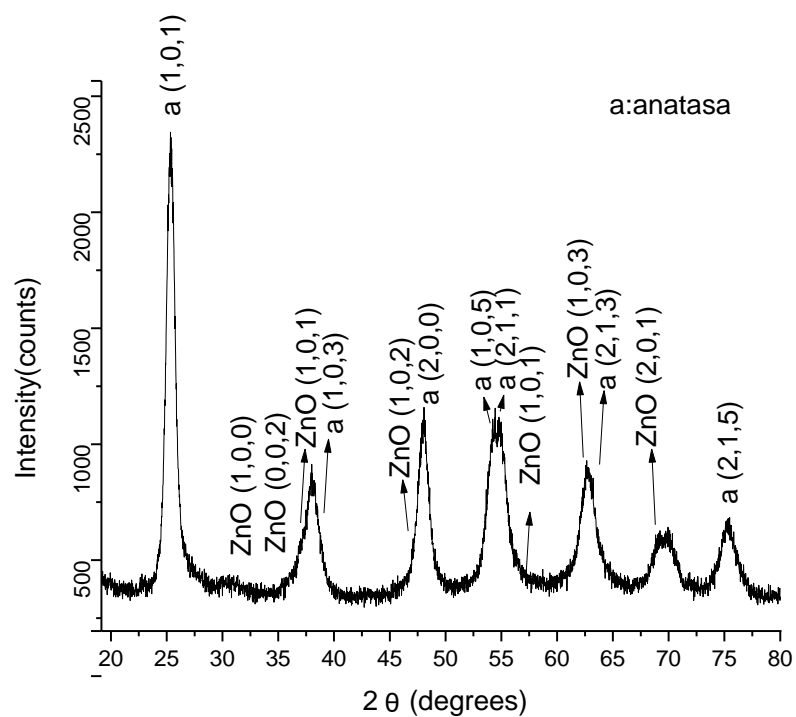

# ZnO/TiO<sub>2</sub> from PS-co-4-PVP precursors

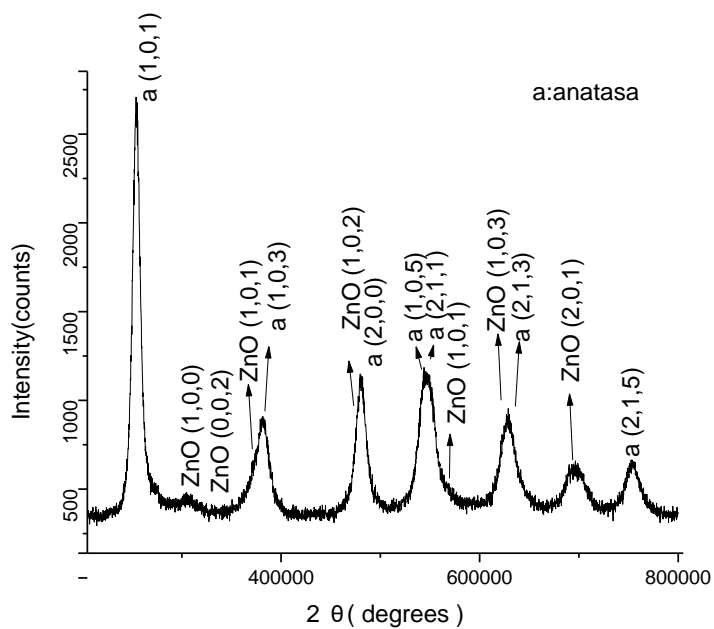

# ZnO/Al<sub>2</sub>O<sub>3</sub> from Chitosan

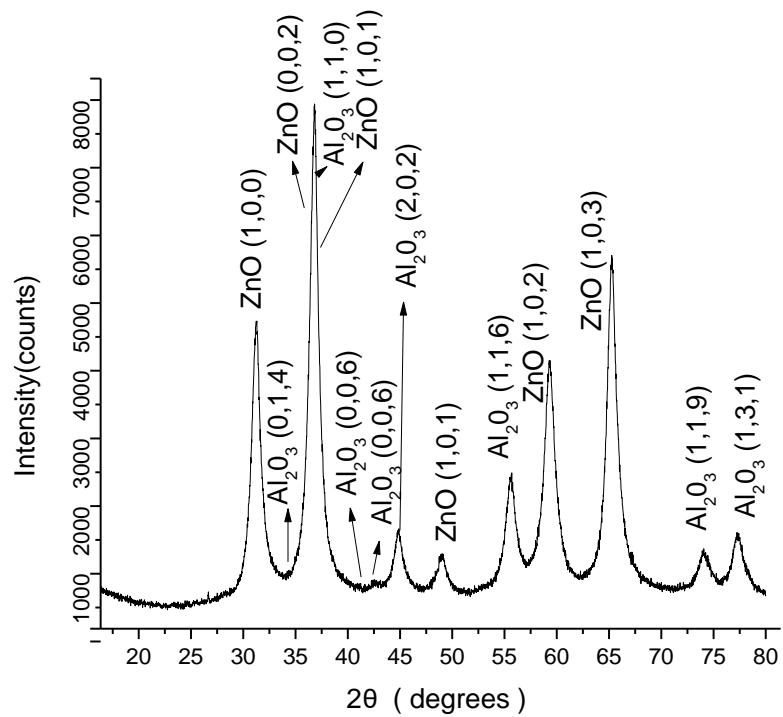

# ZnO/Al<sub>2</sub>O<sub>3</sub> from PS-co-4-PVP

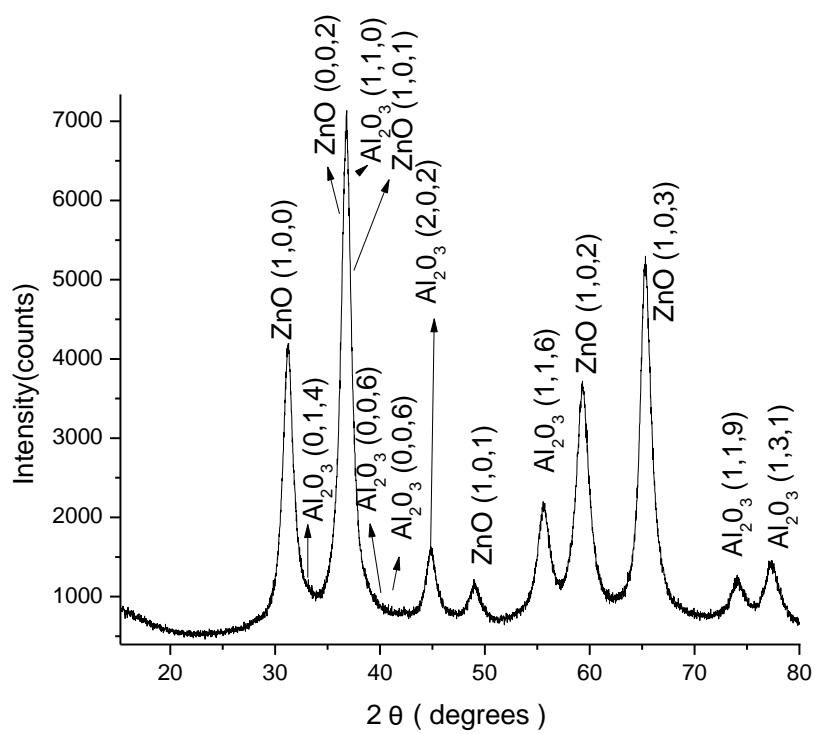

# Eu<sub>2</sub>O<sub>3</sub>/TiO<sub>2</sub> from Chitosan

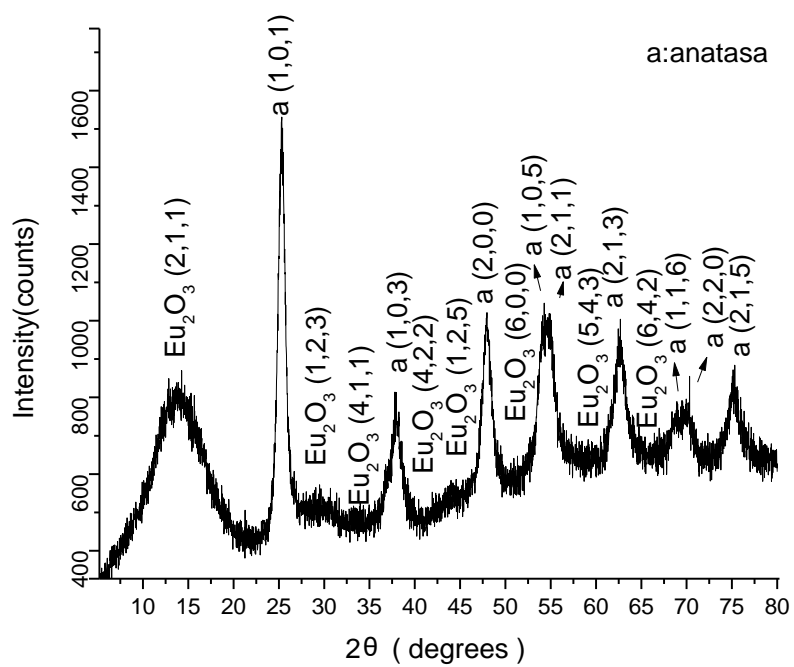

# Eu<sub>2</sub>O<sub>3</sub>/TiO<sub>2</sub> from PS-co-4-PVP

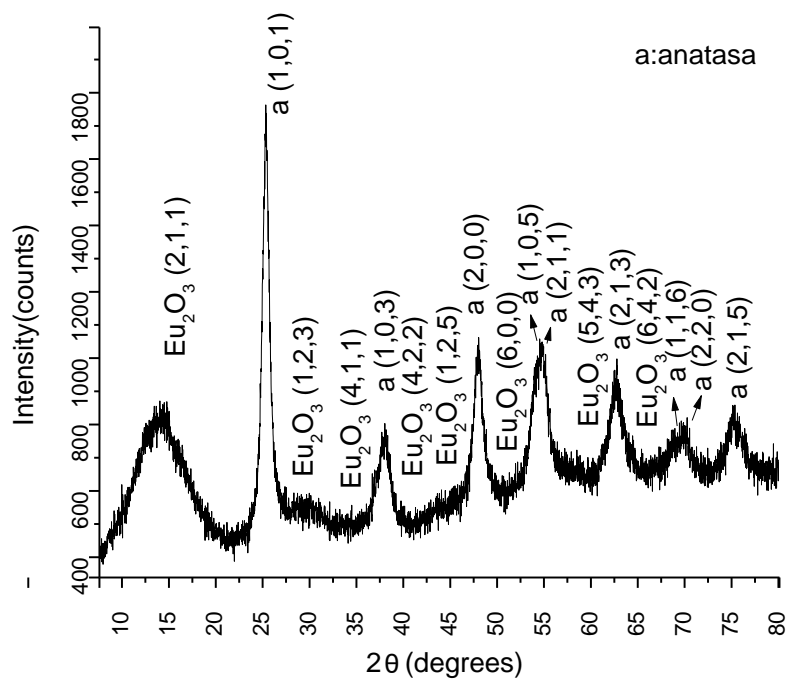

# $\text{Eu}_2\text{O}_3/\text{Al}_2\text{O}_3$ from Chitosan

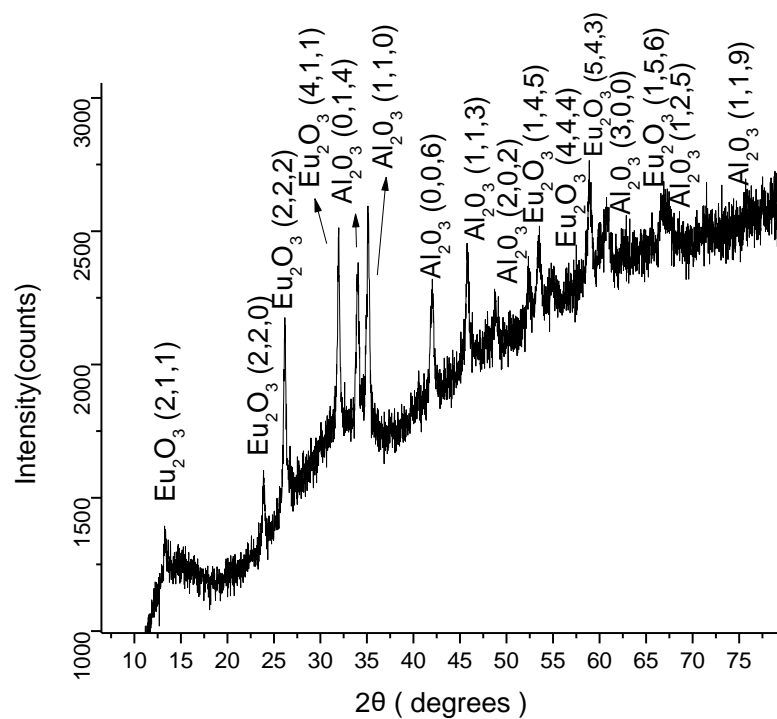

# $\text{Eu}_2\text{O}_3/\text{TiO}_2$ from PS-co-4-PVP

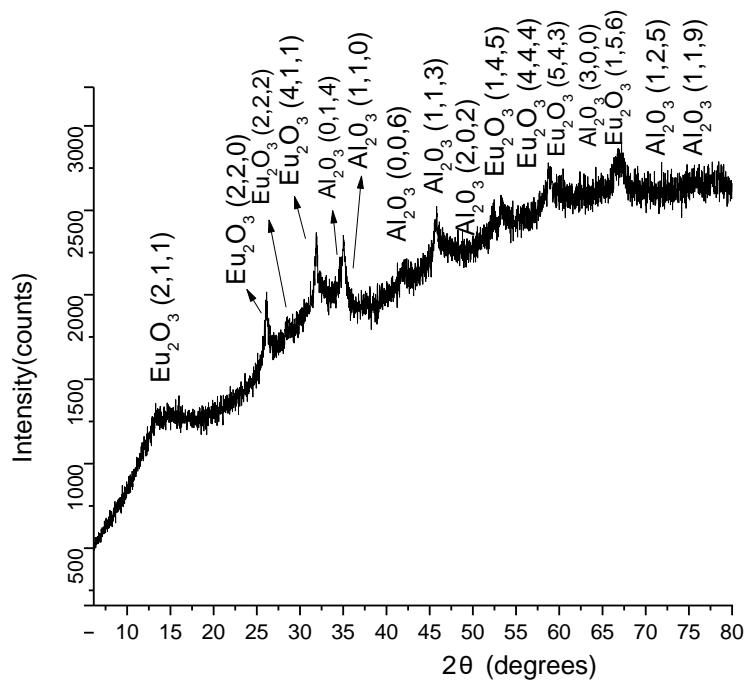



**S3** EDS mapping of Au/SiO<sub>2</sub> composite showing the distribution of the Au nanoparticles inside SiO<sub>2</sub>. Reproduced from reference 14.

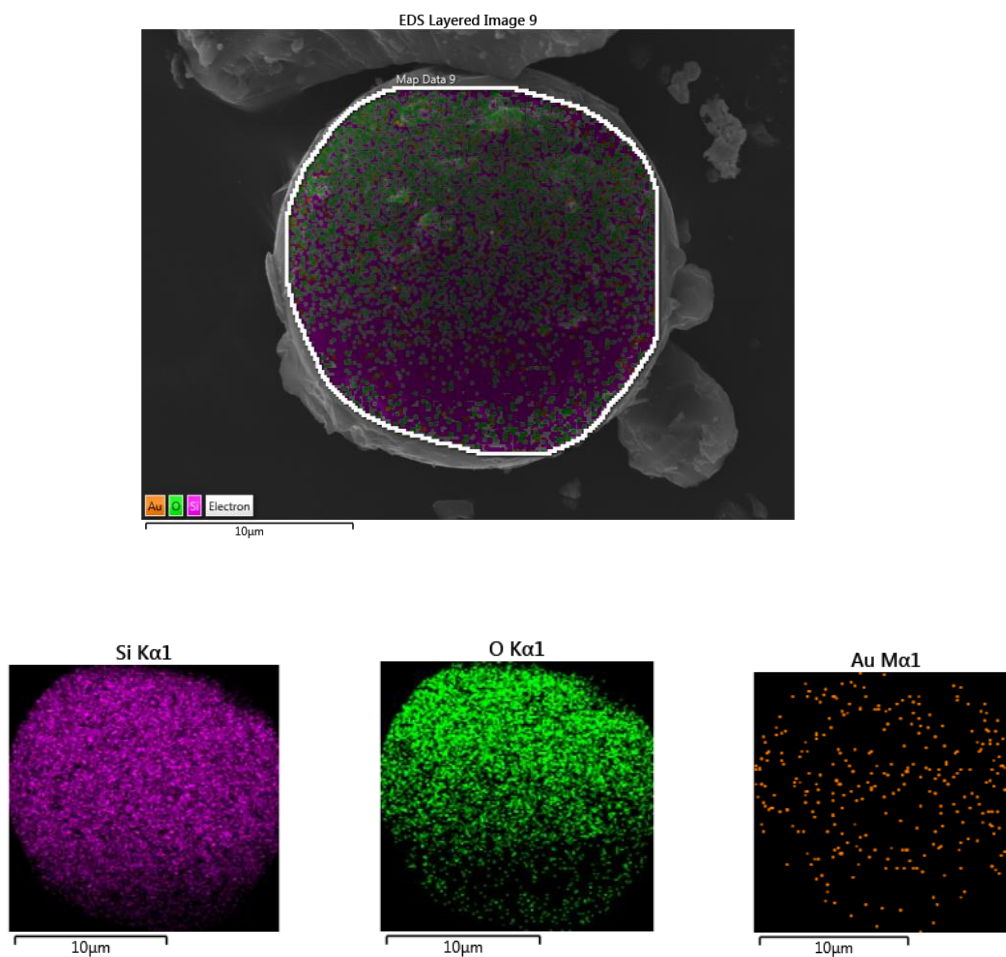

**S4** SEM image for the (a) Au/SiO<sub>2</sub>, (b) Au/TiO<sub>2</sub>, (c) Au/Al<sub>2</sub>O<sub>3</sub> composites

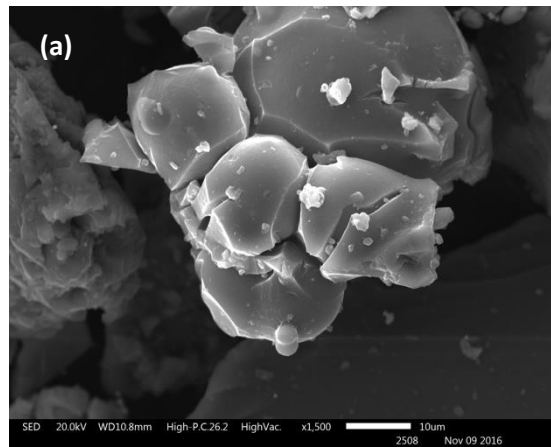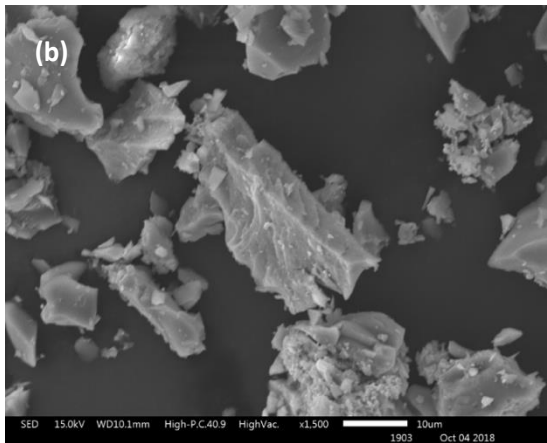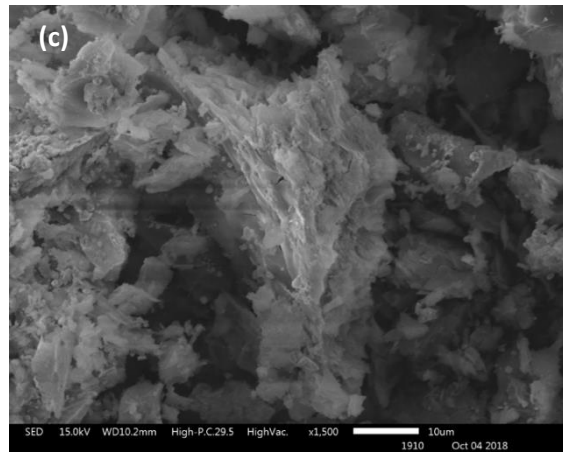

**S5** Comparación de los SEM del composite (a)  $\text{Eu}_2\text{O}_3/\text{TiO}_2$  and (b)  $\text{Eu}_2\text{O}_3/\text{Al}_2\text{O}_3$ .

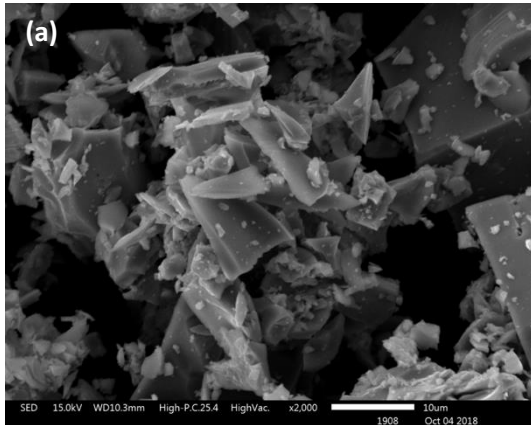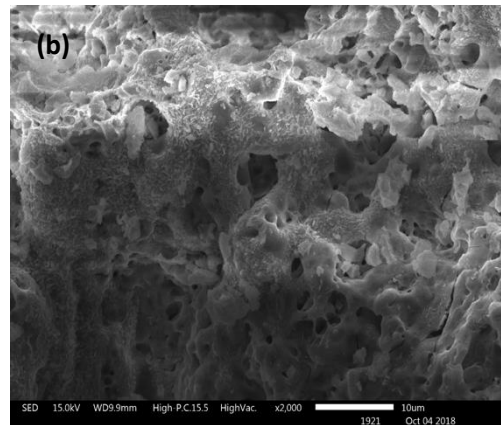

## S6 SEM image for the composite ZnO/Al<sub>2</sub>O<sub>3</sub>

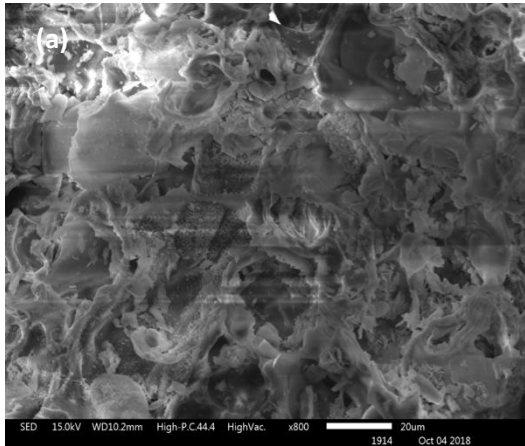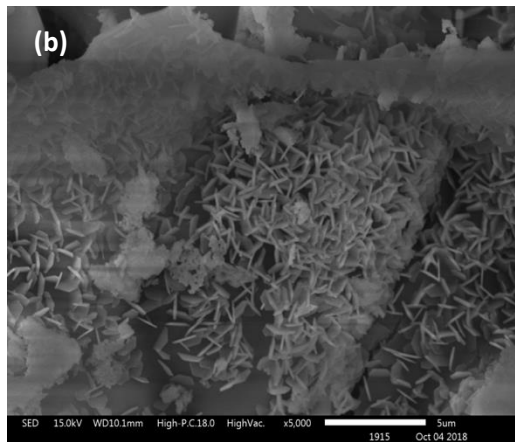

Supplement: s1 [file s1]
